# Supplementary material for: Alteration of Bacterial Communities in Anterior Nares and Skin Sites of Patients Undergoing Arthroplasty Surgery: Analysis by 16S rRNA and Staphylococcal-Specific <em>tuf</em> Gene Sequencing
Source: Preprints.org preprint supplement (doi:10.20944/preprints202011.0640.v1), 2020-11-25
Supplement: Supplementary file 1 [file supplementary]

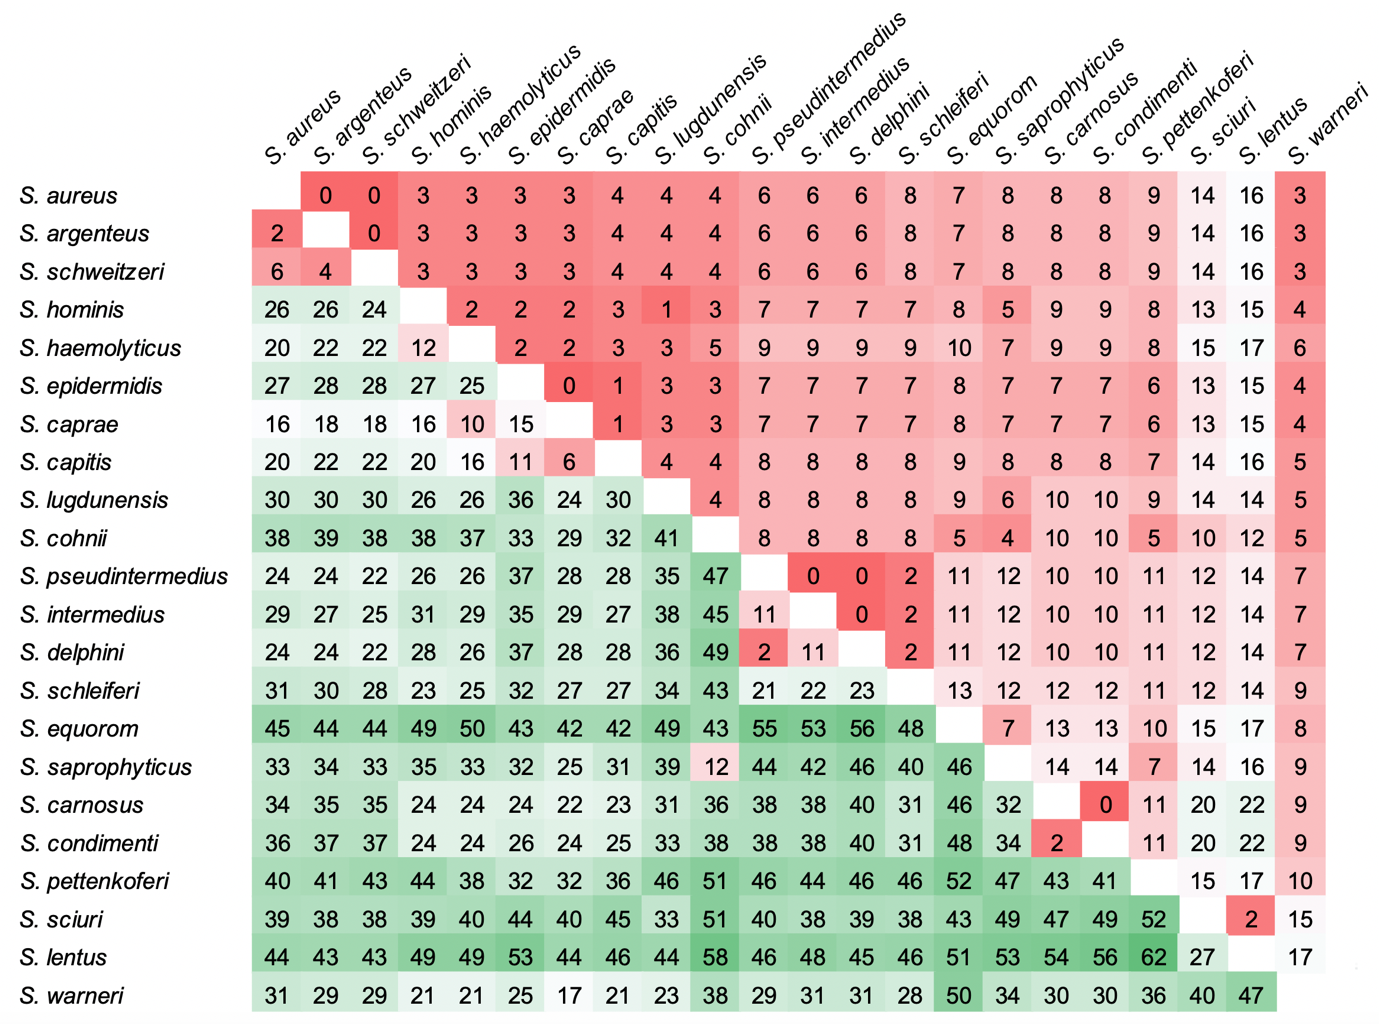


**Figure S7.** Single nucleotide polymorphism (SNP) differences between Staphylococcal species in the 16S rRNA (V3-V4) gene region sequenced in this study (top) and the amplified *tuf* gene region (bottom) calculated from the most prevalent ASV from each staphylococcal species.
