# Supplementary material for: Alteration of Bacterial Communities in Anterior Nares and Skin Sites of Patients Undergoing Arthroplasty Surgery: Analysis by 16S rRNA and Staphylococcal-Specific <em>tuf</em> Gene Sequencing
Source: Preprints.org preprint supplement (doi:10.20944/preprints202011.0640.v1), 2020-11-25
Supplement: Supplementary file 2 [file Supplementary Figure S1.docx]

**Figure S1.** Overview of read counts by sampling site in 16S rRNA (V3-V4) gene sequencing *before* and *after* arthroplasty surgery.
