# Supplementary material for: Alteration of Bacterial Communities in Anterior Nares and Skin Sites of Patients Undergoing Arthroplasty Surgery: Analysis by 16S rRNA and Staphylococcal-Specific <em>tuf</em> Gene Sequencing
Source: Preprints.org preprint supplement (doi:10.20944/preprints202011.0640.v1), 2020-11-25
Supplement: Supplementary file 3 [file Supplementary Figure S2.docx]

**Figure S2.** Overview of sample availability for each sampling site with representation of samples with <2,000 or >2,000 read counts for arthroplasty patients in 16S rRNA (V3-V4) gene sequencing analysis.
