# Supplementary material for: Alteration of Bacterial Communities in Anterior Nares and Skin Sites of Patients Undergoing Arthroplasty Surgery: Analysis by 16S rRNA and Staphylococcal-Specific <em>tuf</em> Gene Sequencing
Source: Preprints.org preprint supplement (doi:10.20944/preprints202011.0640.v1), 2020-11-25
Supplement: Supplementary file 4 [file Supplementary Figure S3.docx]

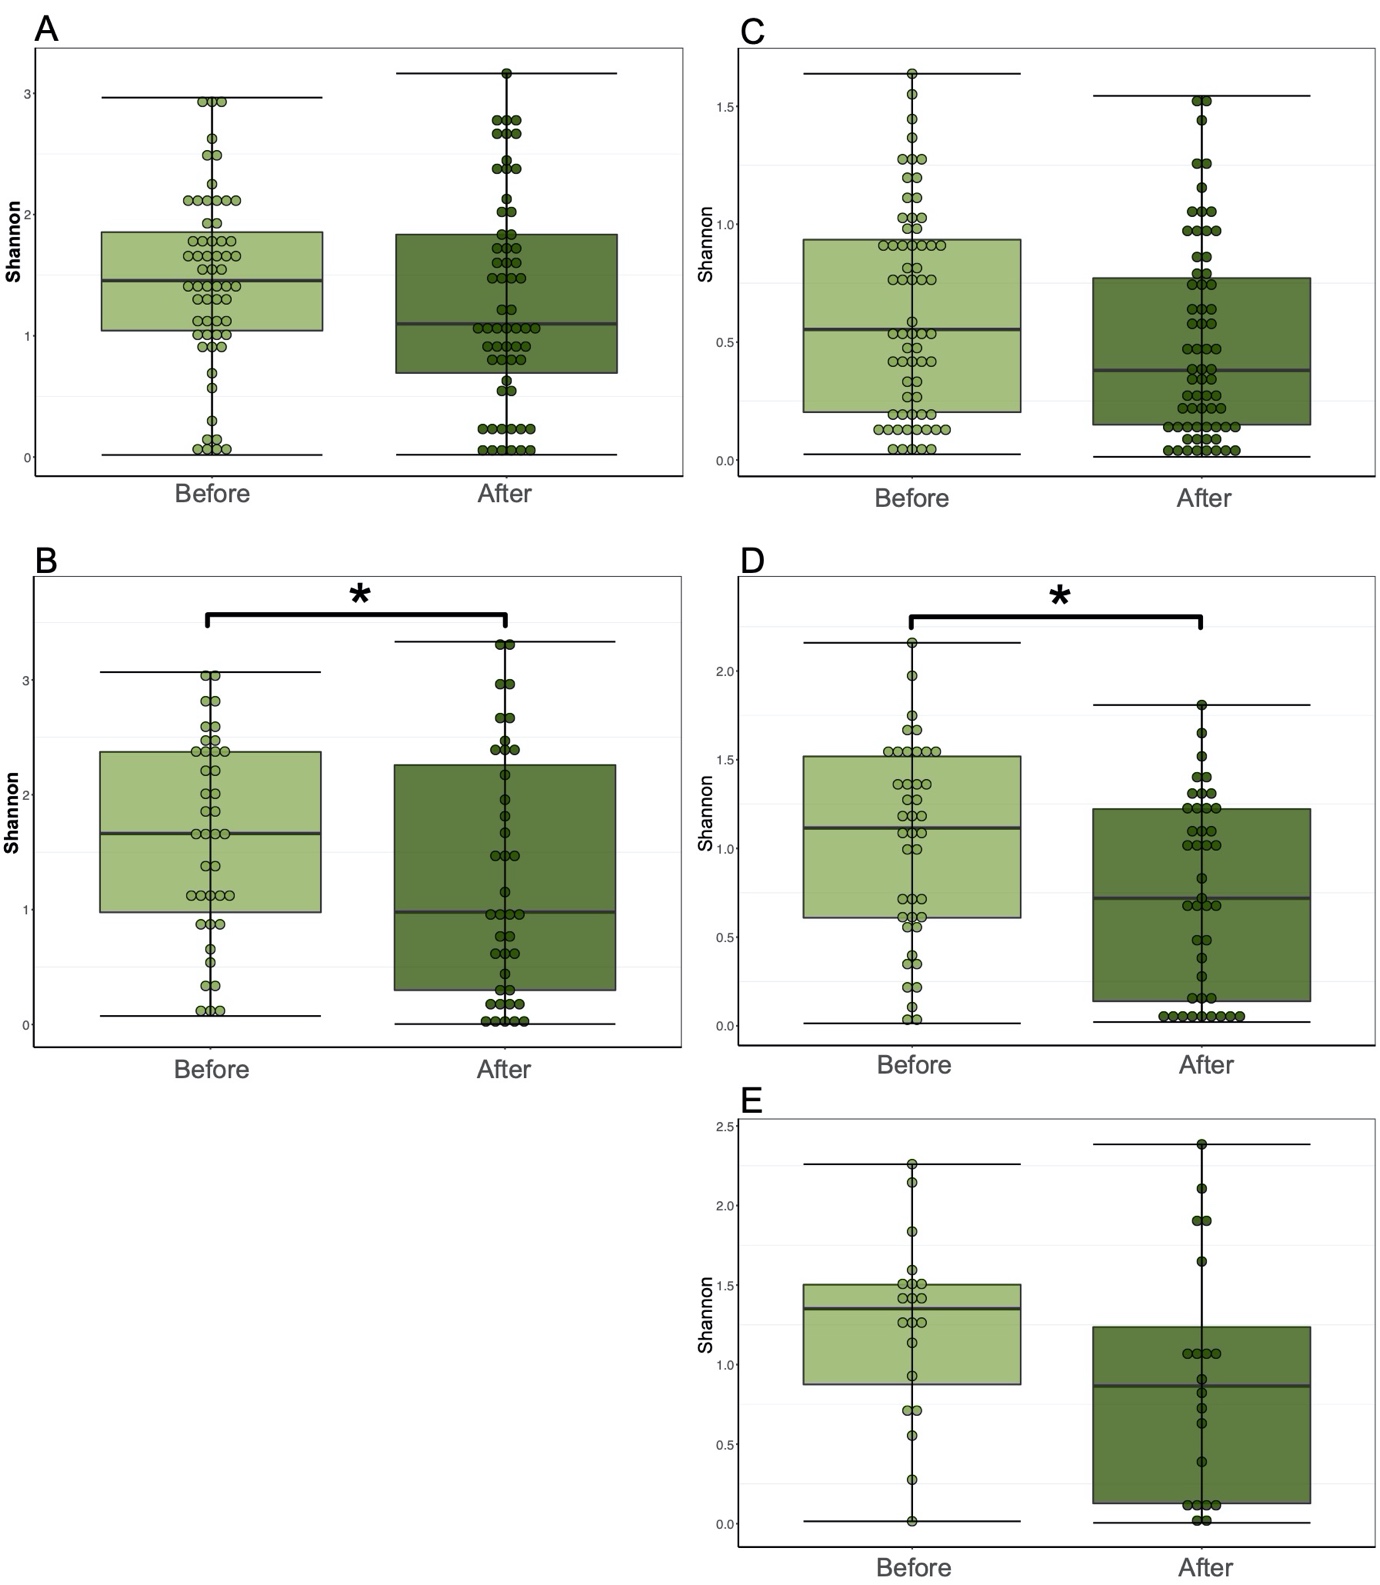


**Figure S3.** Alpha (Shannon) diversity plots for 16S rRNA gene sequencing of (A) anterior nares and (B) groin samples. Alpha (Shannon) diversity plots for *tuf* gene sequencing of (C) anterior nares, (D) groin, and (E) operation sites samples. Asterix signifies a significant change with a p-value < 0.05.
