# Supplementary material for: Alteration of Bacterial Communities in Anterior Nares and Skin Sites of Patients Undergoing Arthroplasty Surgery: Analysis by 16S rRNA and Staphylococcal-Specific <em>tuf</em> Gene Sequencing
Source: Preprints.org preprint supplement (doi:10.20944/preprints202011.0640.v1), 2020-11-25
Supplement: Supplementary file 6 [file Supplementary Figure S5.docx]

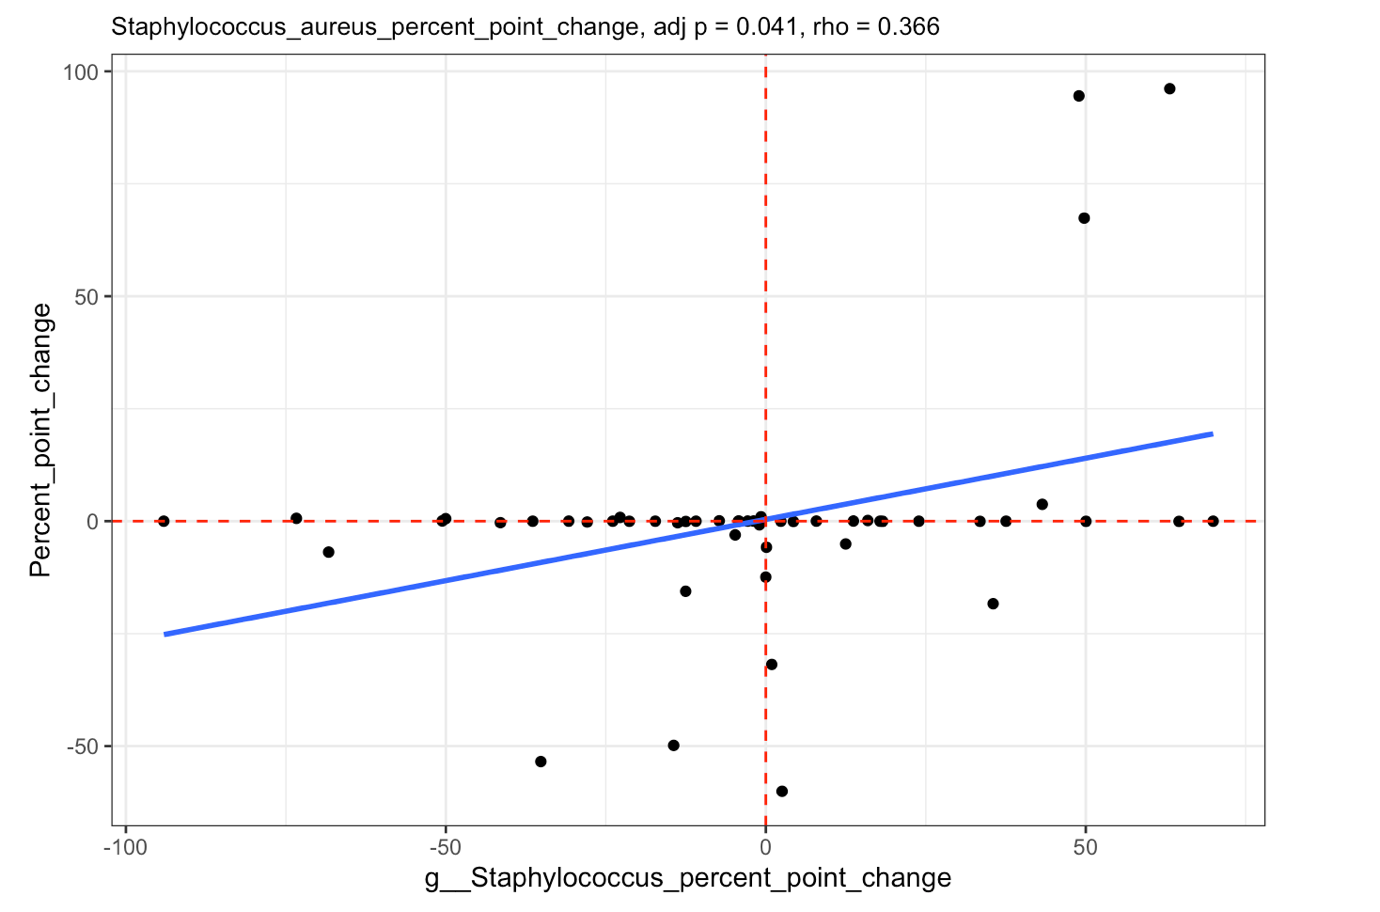


**Figure S5.** Correlation between alterations in *S. aureus* ASVs in *tuf* gene sequencing and total staphylococcal percentage point change in 16S rRNA (V3-V4) gene sequencing in nares of patients *before* compared to *after* arthroplasty surgery.
